# Supplementary material
Source: Springer Nature journal article supplement (https://www.springermedizin.de/resource/supplementary/12875_2010_536_MOESM3_ESM.pdf/9434890)
Supplement: MOESM3 [file 9434890]

**Table 3: How often should the team’s performance be evaluated in months? Survey results for all 121 respondents**

| <b>Time for Evaluations</b> | <b>Frequency</b> | <b>Percent</b> |
|-----------------------------|------------------|----------------|
| Monthly                     | 2                | 1.7            |
| Every 3 Months              | 12               | 9.9            |
| Every 6 Months              | 40               | 33.1           |
| Yearly                      | 46               | 38.0           |
| Every 2 Years               | 21               | 17.4           |
